# Supplementary material for: Cellulose nanofibril/boron nitride nanosheet composites with enhanced energy density and thermal stability by interfibrillar cross-linking through Ca2+
Source: Royal Society of Chemistry journal article supplement (doi:10.1039/c7ta08188j), 2017-11-17
Supplement: c7ta08188j1.pdf [file c7ta08188j1.pdf]

## Supporting Information

### **Cellulose nanofibril/boron nitride nanosheet composites with enhanced energy density and thermal stability by interfibrillar cross-linking through Ca<sup>2+</sup>**

Junwei Yang,<sup>a</sup> Haian Xie,<sup>a</sup> Hao Chen,<sup>a</sup> Zhuqun Shi,<sup>c</sup> Tao Wu,<sup>a</sup> Quanling Yang<sup>\*a,b</sup> and Chuanxi Xiong<sup>\*a</sup>

<sup>a</sup> State Key Laboratory of Advanced Technology for Materials Synthesis and Processing, and School of Materials Science and Engineering, Wuhan University of Technology, Wuhan 430070, China. E-mail addresses: yangql@whut.edu.cn (Q.Y.); cxiong@whut.edu.cn (C.X.)

<sup>b</sup> State Key Laboratory of Pulp and Paper Engineering, South China University of Technology, Guangzhou 510640, China

<sup>c</sup> School of Chemistry, Chemical Engineering and Life Sciences, Wuhan University of Technology, Wuhan 430070, China

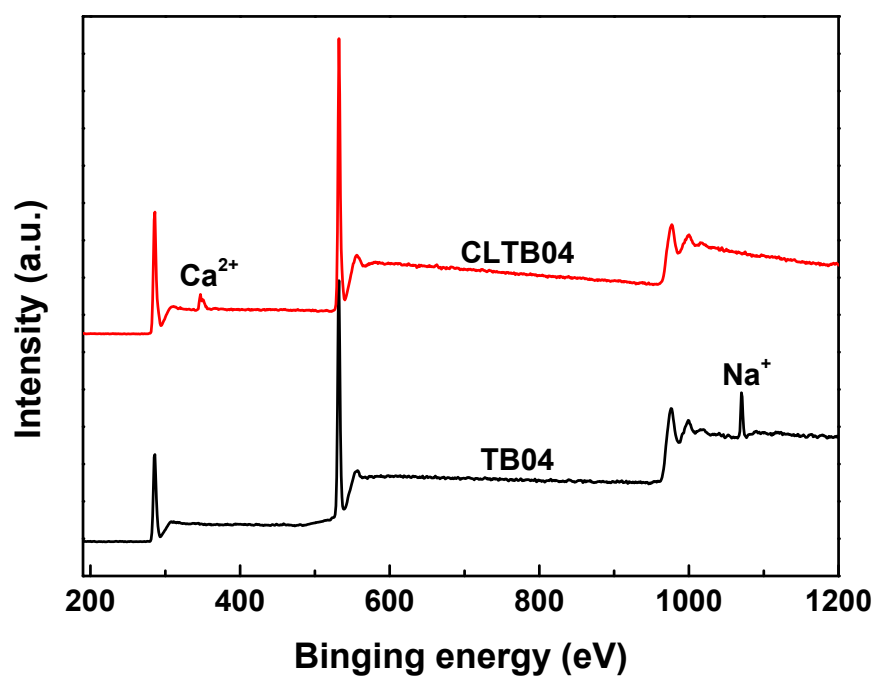

Fig. S1. XPS patterns of TB04 and CLTB04 films.

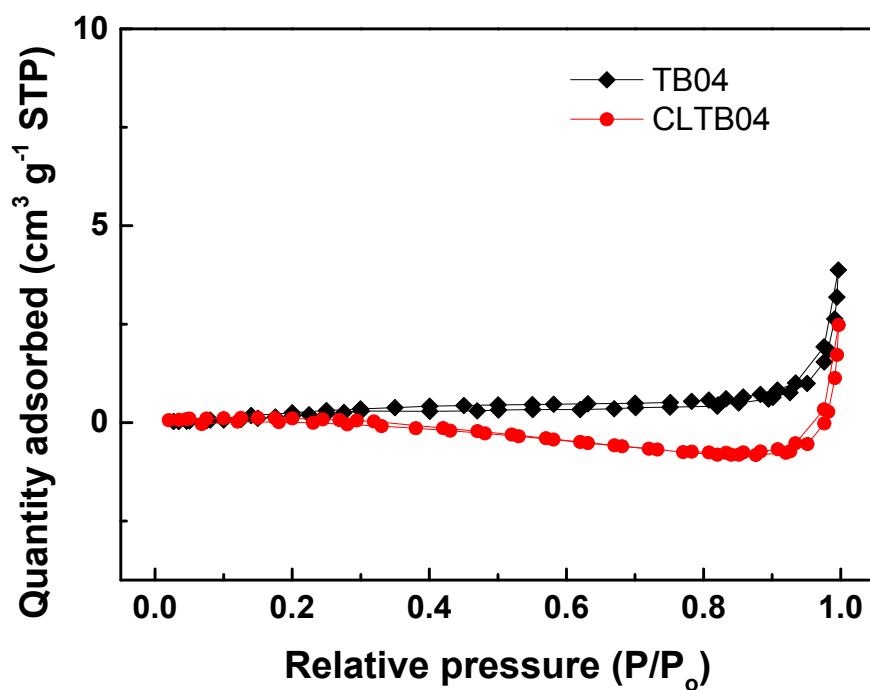

Fig. S2. Nitrogen adsorption/desorption isotherms of TB04 and CLTB04 films.
